# Supplementary material for: Multiple imputation by predictive mean matching in cluster-randomized trials
Source: PubMed Central journal article supplement (PMC7106802; doi:10.1186/s12874-020-00948-6), 2020-03-30
Supplement: 12874_2020_948_MOESM1_ESM.pdf [file 12874_2020_948_MOESM1_ESM.pdf]

## Supplemental material

### Supplemental figures

Model 1a: Estimation of treatment group mean with correctly specified mean model

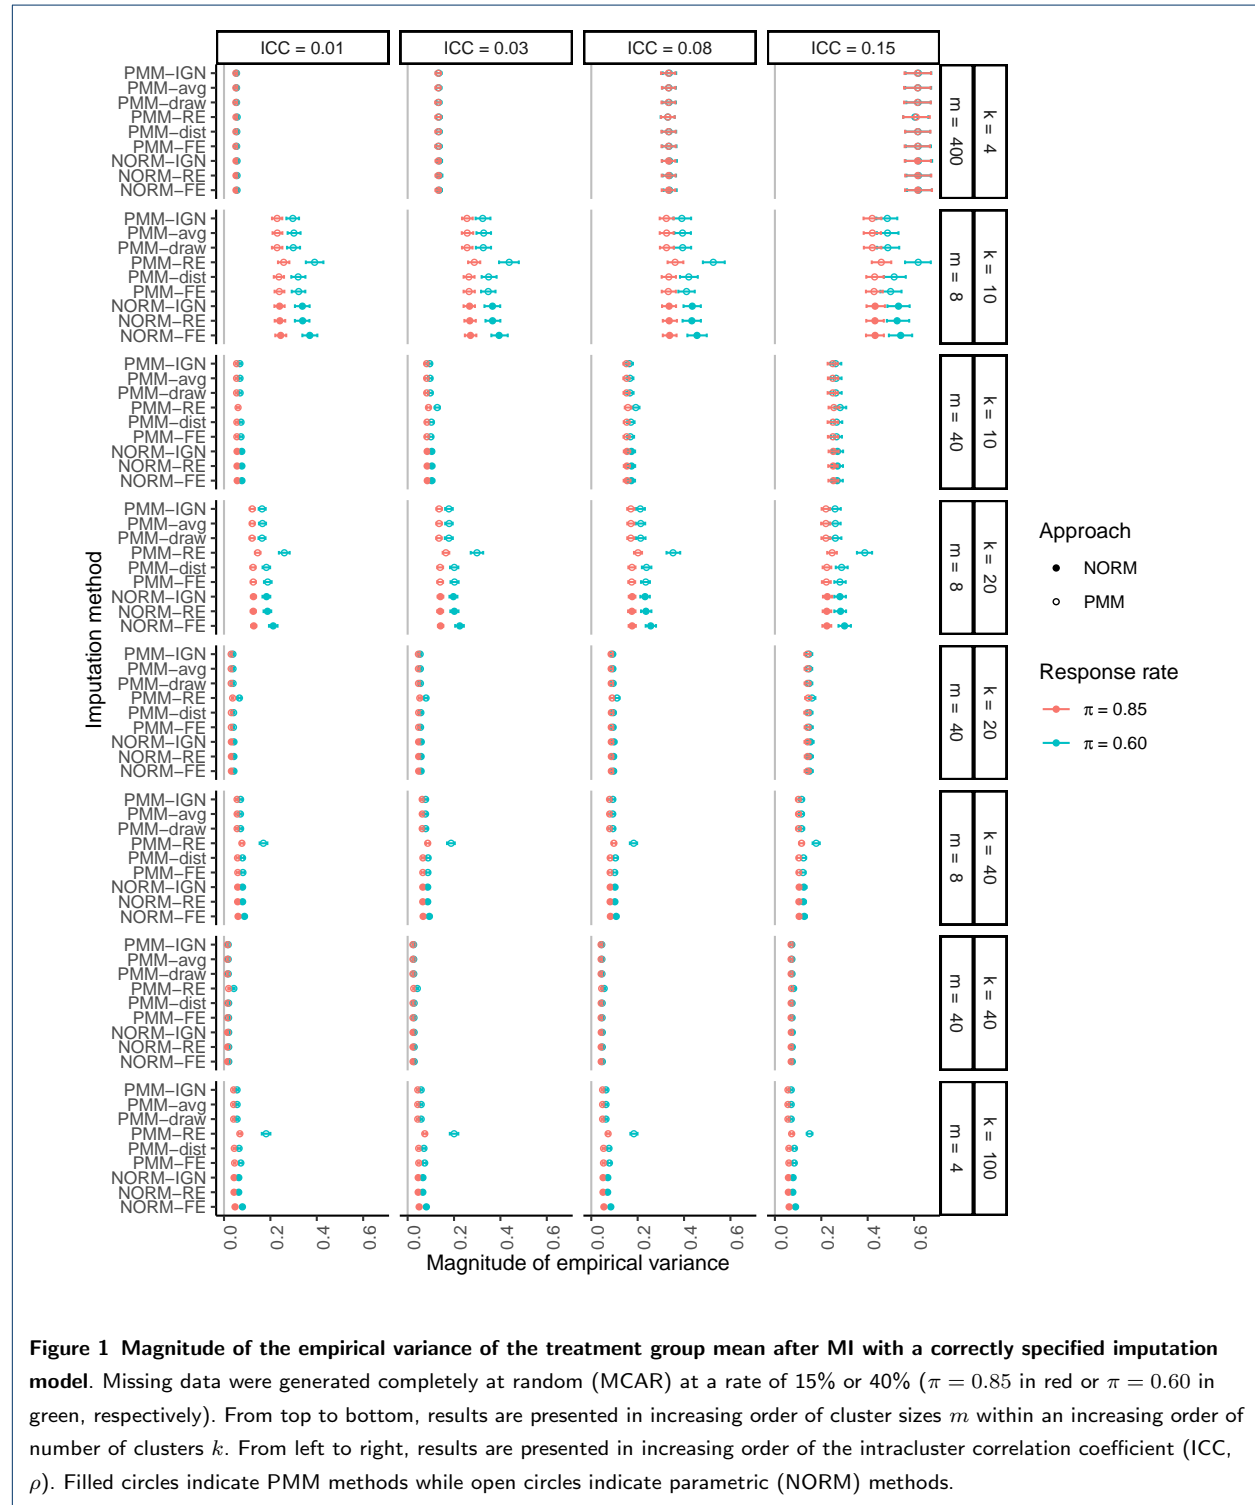

Model 1b: Estimation of regression coefficient with correctly specified mean model

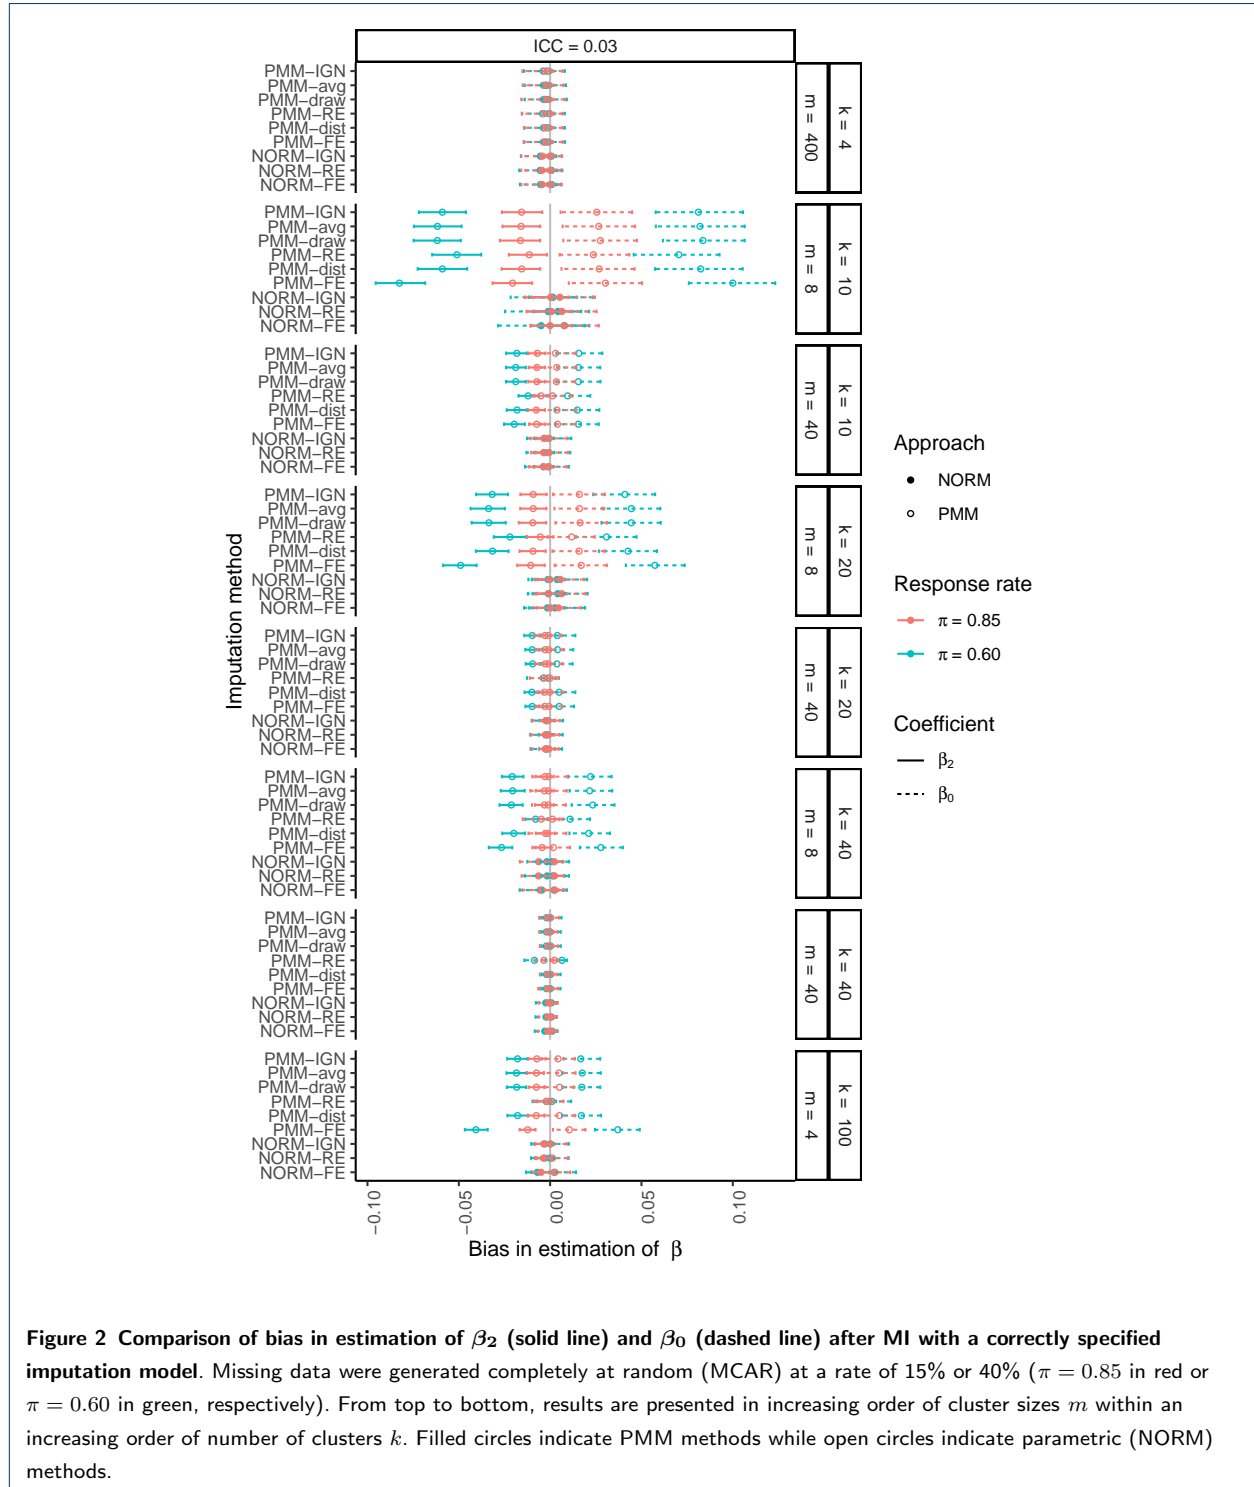

**Figure 2 Comparison of bias in estimation of  $\beta_2$  (solid line) and  $\beta_0$  (dashed line) after MI with a correctly specified imputation model.** Missing data were generated completely at random (MCAR) at a rate of 15% or 40% ( $\pi = 0.85$  in red or  $\pi = 0.60$  in green, respectively). From top to bottom, results are presented in increasing order of cluster sizes  $m$  within an increasing order of number of clusters  $k$ . Filled circles indicate PMM methods while open circles indicate parametric (NORM) methods.

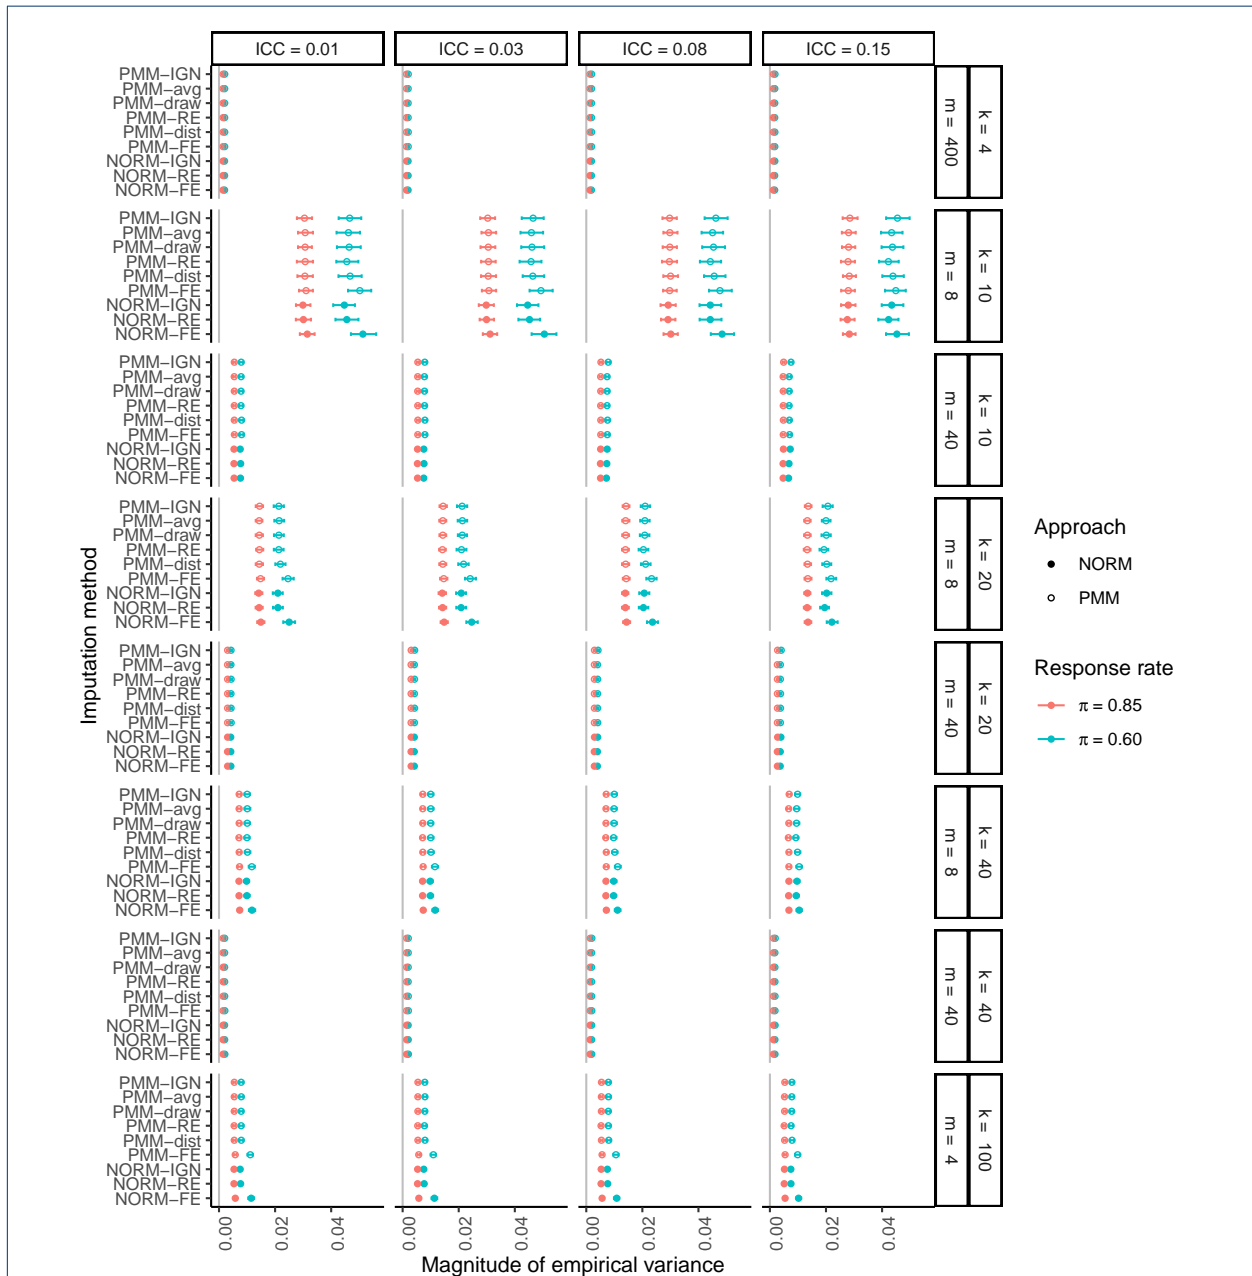

**Figure 3** Magnitude of the empirical variance of  $\beta_2$  after MI with a correctly specified imputation model. Missing data were generated completely at random (MCAR) at a rate of 15% or 40% ( $\pi = 0.85$  in red or  $\pi = 0.60$  in green, respectively). From top to bottom, results are presented in increasing order of cluster sizes  $m$  within an increasing order of number of clusters  $k$ . From left to right, results are presented in increasing order of the intracluster correlation coefficient (ICC,  $\rho$ ). Filled circles indicate PMM methods while open circles indicate parametric (NORM) methods.

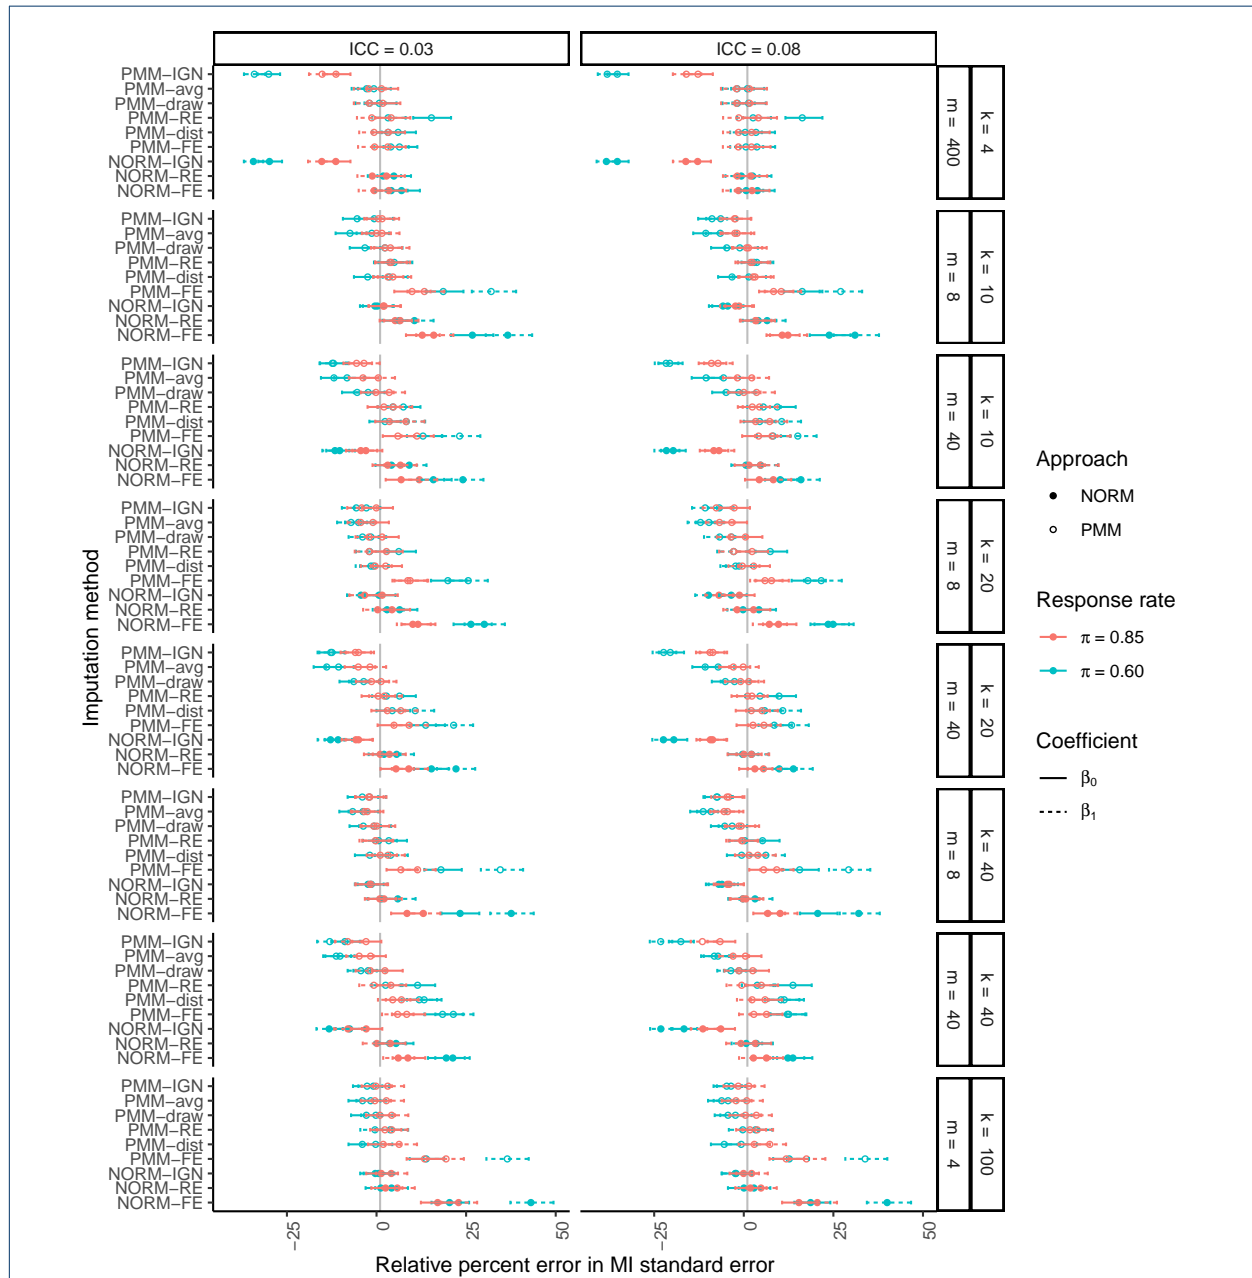

**Figure 4** Comparison of relative percent error in the MI standard error of  $\beta_0$  (solid line) and  $\beta_1$  (dashed line) after MI with a correctly specified imputation model. Missing data were generated completely at random (MCAR) at a rate of 15% or 40% ( $\pi = 0.85$  in red or  $\pi = 0.60$  in green, respectively). From top to bottom, results are presented in increasing order of cluster sizes  $m$  within an increasing order of number of clusters  $k$ . Filled circles indicate PMM methods while open circles indicate parametric (NORM) methods.

Model 2: Estimation of treatment group mean with misspecified mean model

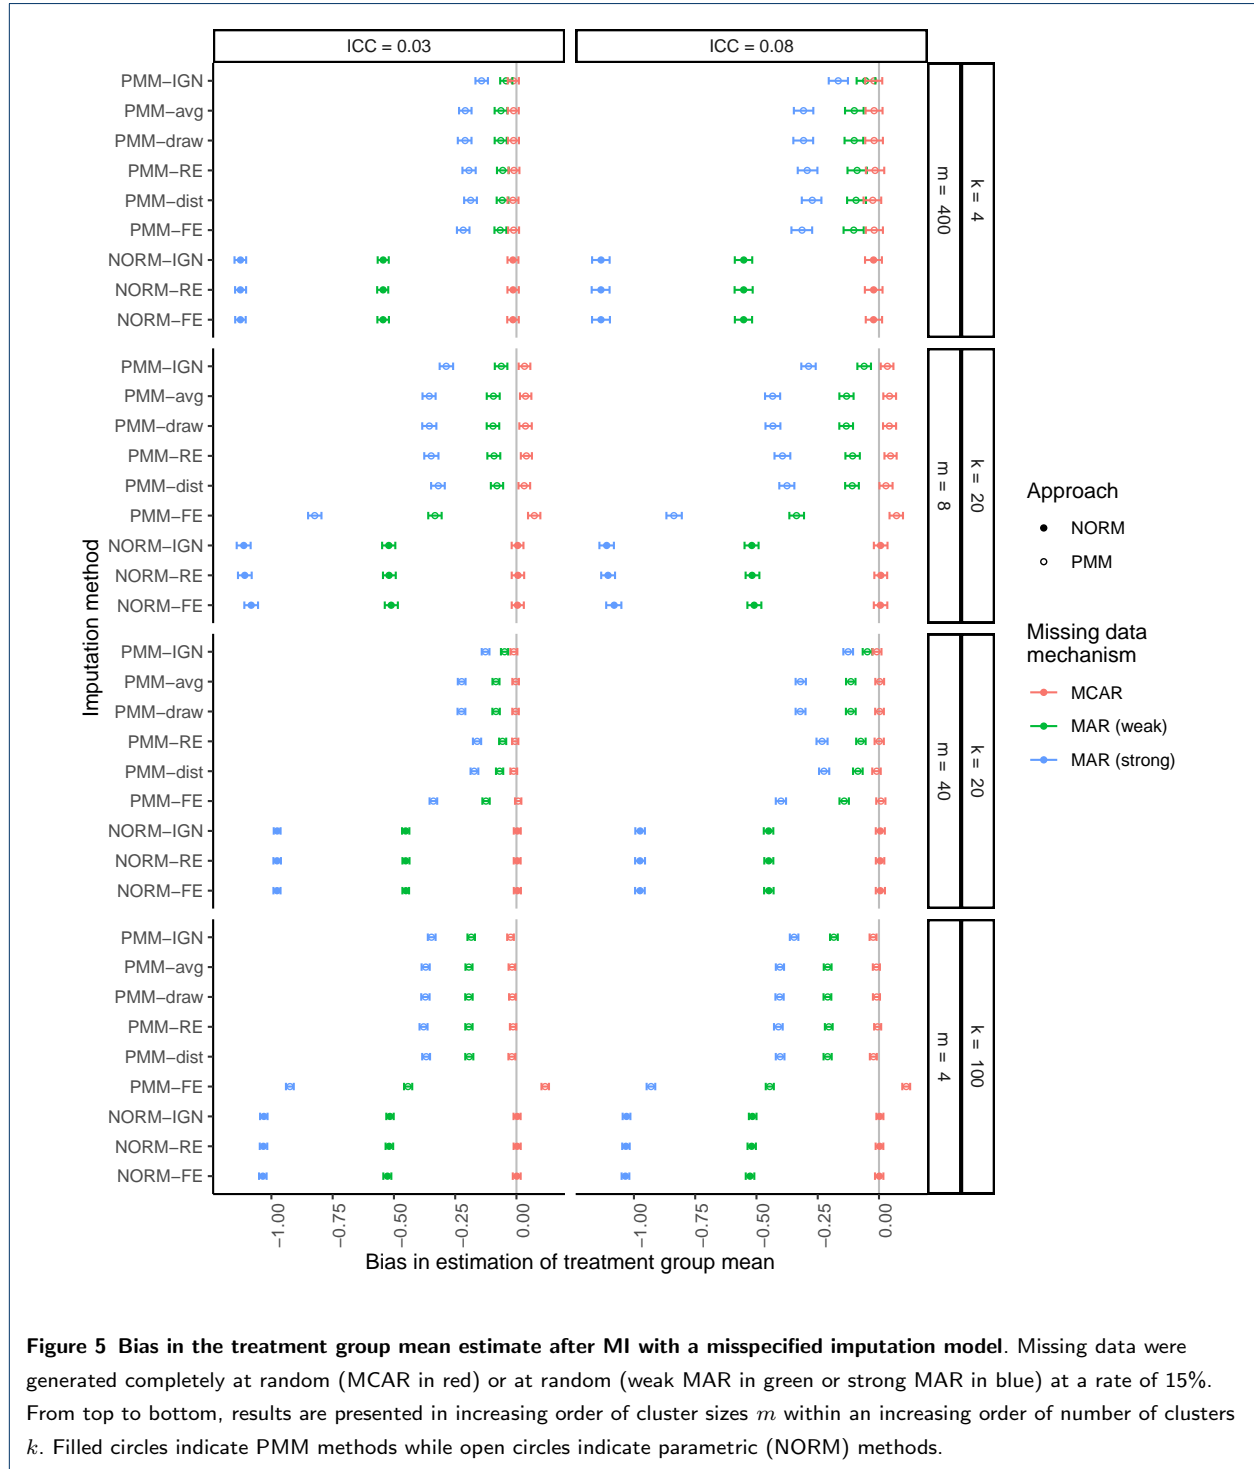

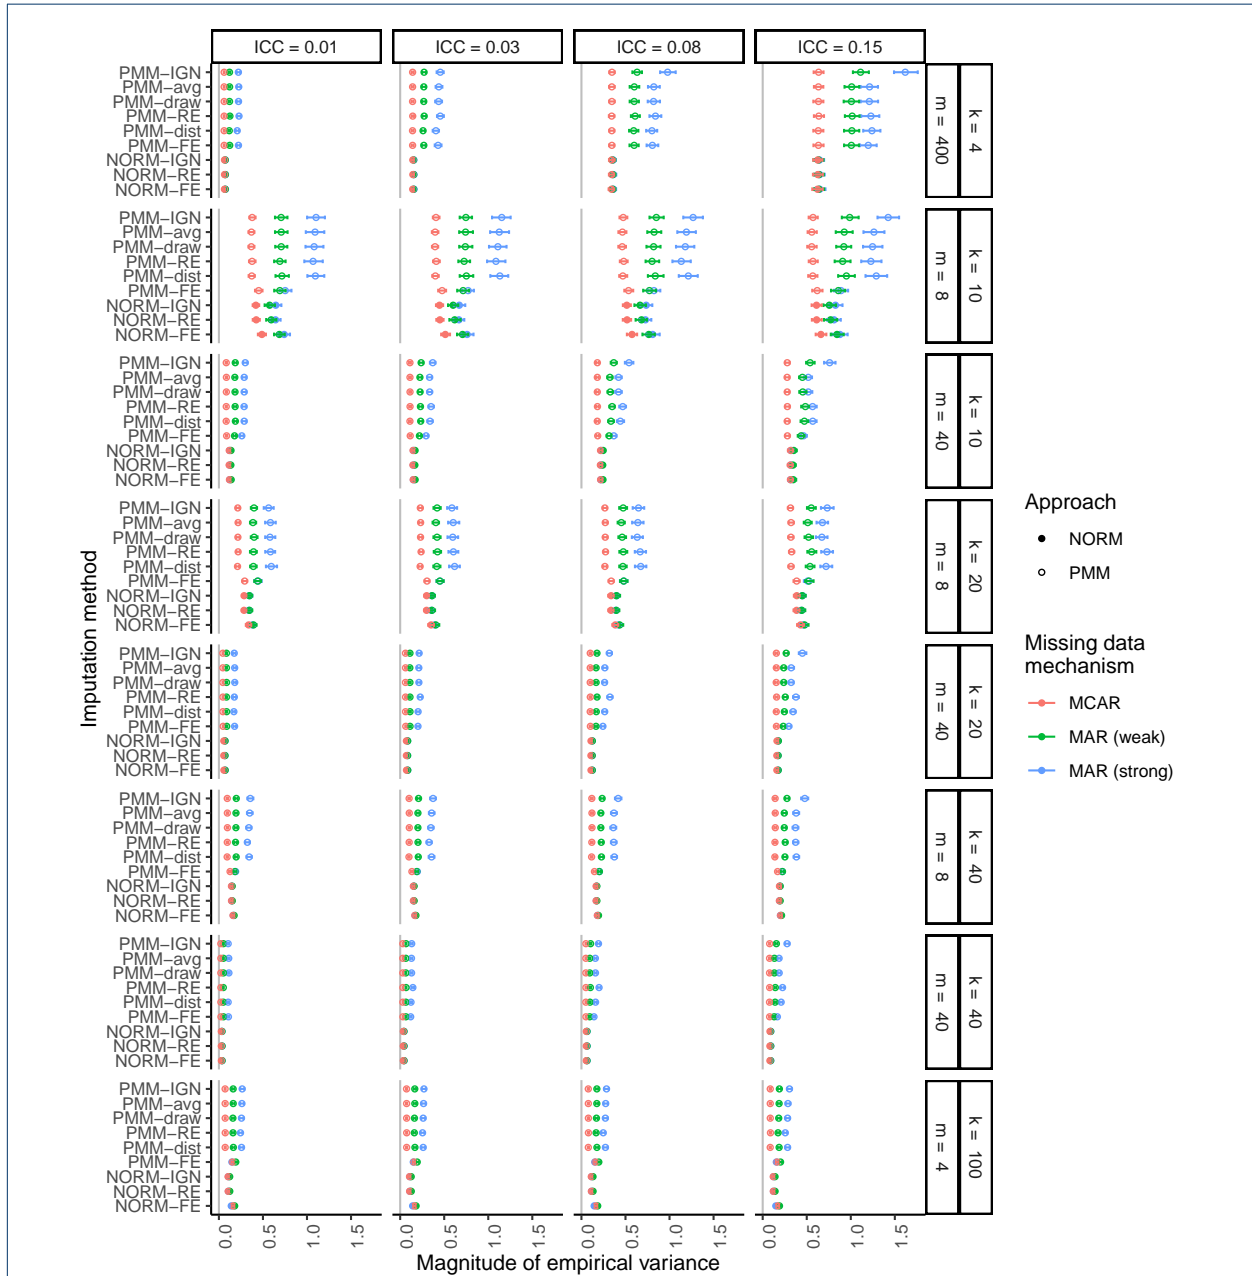

**Figure 6** Magnitude of the empirical variance of the treatment group mean after MI with a misspecified imputation model. Missing data were generated completely at random (MCAR in red) or at random (weak MAR in green or strong MAR in blue) at a rate of 40%. From top to bottom, results are presented in increasing order of cluster sizes  $m$  within an increasing order of number of clusters  $k$ . From left to right, results are presented in increasing order of the intracluster correlation coefficient (ICC,  $\rho$ ). Filled circles indicate PMM methods while open circles indicate parametric (NORM) methods.

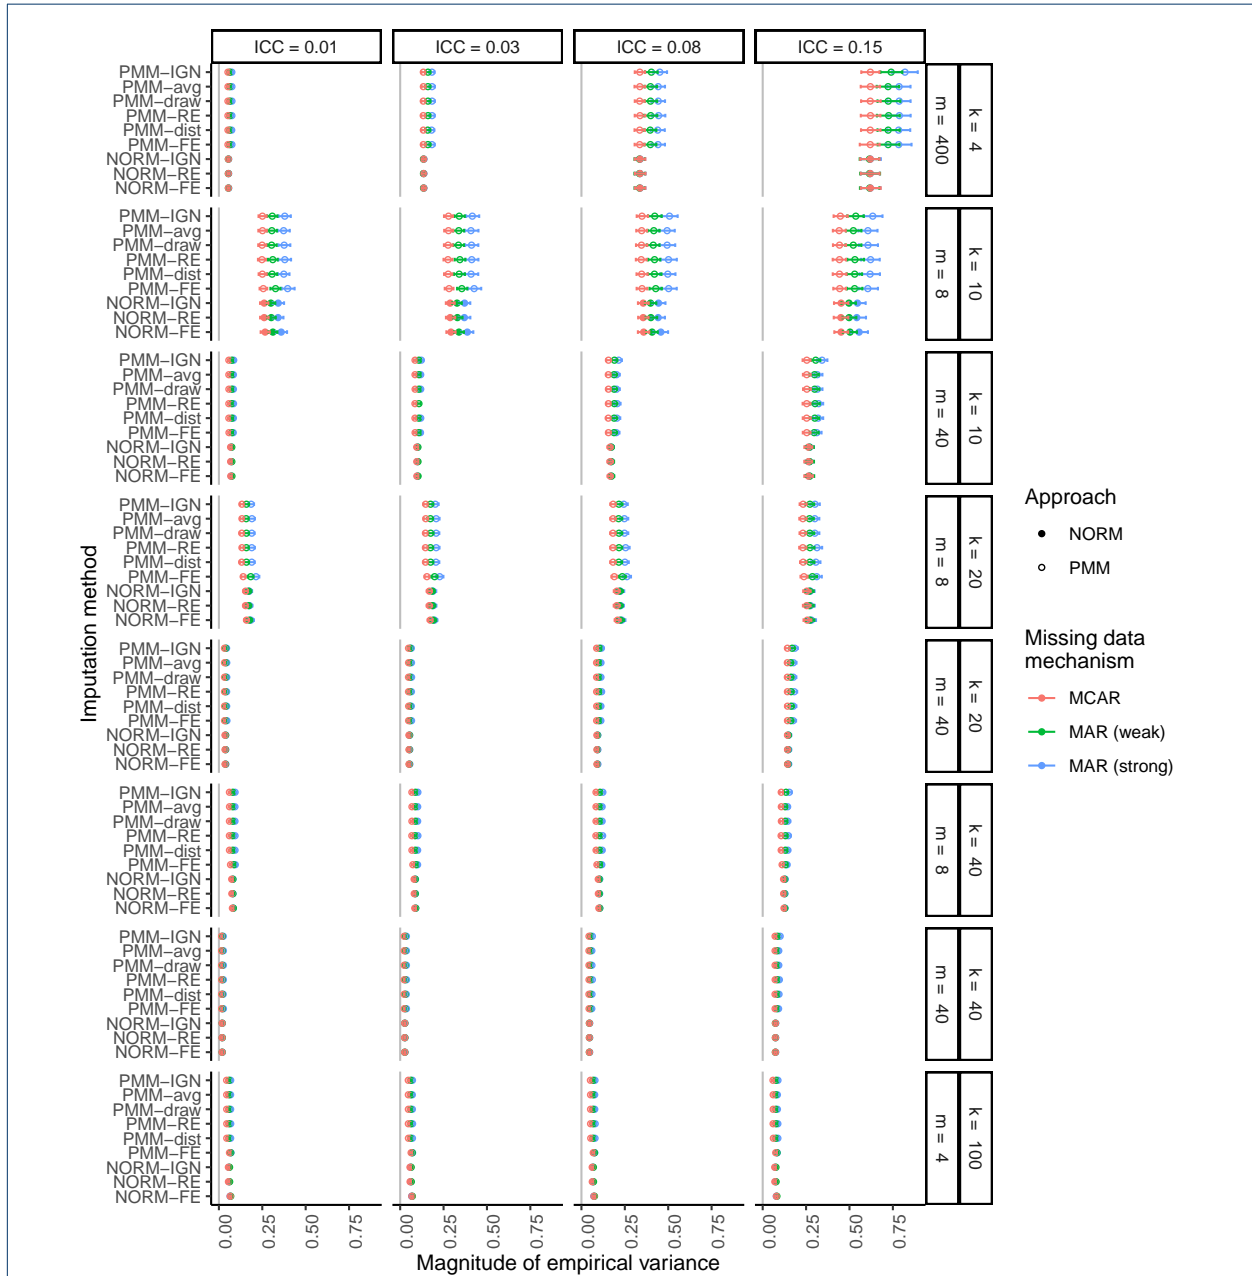

**Figure 7** Magnitude of the empirical variance of the treatment group mean after MI with a misspecified imputation model. Missing data were generated completely at random (MCAR in red) or at random (weak MAR in green or strong MAR in blue) at a rate of 15%. From top to bottom, results are presented in increasing order of cluster sizes  $m$  within an increasing order of number of clusters  $k$ . From left to right, results are presented in increasing order of the intracluster correlation coefficient (ICC,  $\rho$ ). Filled circles indicate PMM methods while open circles indicate parametric (NORM) methods.

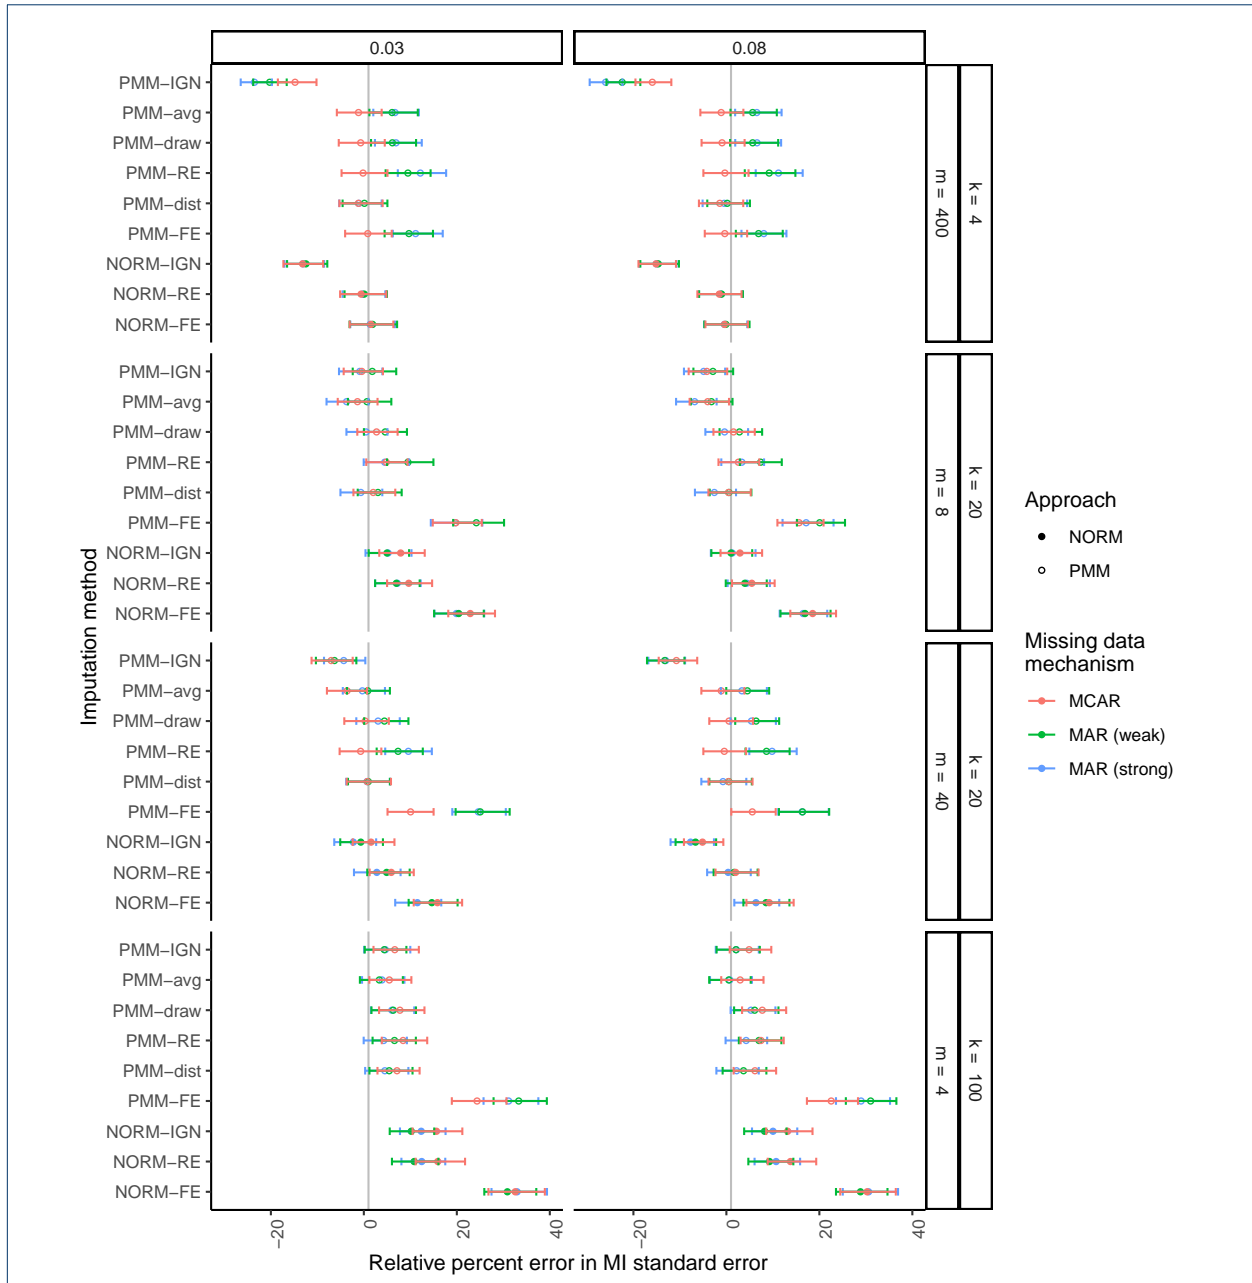

**Figure 8** Relative percent error in the MI standard error of the treatment group mean after MI with a misspecified imputation model. Missing data were generated completely at random (MCAR in red) or at random (weak MAR in green or strong MAR in blue) at a rate of 15%. From top to bottom, results are presented in increasing order of cluster sizes  $m$  within an increasing order of number of clusters  $k$ . Filled circles indicate PMM methods while open circles indicate parametric (NORM) methods.



## Supplemental tables

*Model 1a: Estimation of treatment group mean with correctly specified mean model***Table 1** Empirical coverage of 95% confidence intervals for the treatment group mean after multiple imputation by PMM.

| ICC<br>rho | Cluster size<br>m | No. clusters<br>k | PMM<br>FE   | PMM<br>dist | PMM<br>RE   | PMM<br>draw | PMM<br>avg  | PMM<br>IGN  |
|------------|-------------------|-------------------|-------------|-------------|-------------|-------------|-------------|-------------|
| 0.03       | 4                 | 100               | <i>98.4</i> | <i>98.1</i> | <i>96.6</i> | <i>96.9</i> | 96.3        | <i>96.4</i> |
| 0.03       | 8                 | 10                | <i>98</i>   | <i>97.6</i> | <i>97.5</i> | <i>97.3</i> | <i>97.1</i> | <i>97</i>   |
| 0.03       | 8                 | 20                | <i>97.1</i> | 95.9        | 95.2        | 95.4        | 94.2        | 94.9        |
| 0.03       | 8                 | 40                | <i>97.1</i> | <i>96.8</i> | <i>95.7</i> | 96          | 95.4        | 95.5        |
| 0.03       | 40                | 10                | <i>97.9</i> | <i>97.7</i> | <i>97.2</i> | <i>96.8</i> | <i>96.4</i> | <i>96.1</i> |
| 0.03       | 40                | 20                | 95.9        | 95.9        | 95.4        | 94.6        | 93.9        | 93.8        |
| 0.03       | 40                | 40                | <i>97.1</i> | <i>96.8</i> | 96          | 96          | 95.4        | 94.7        |
| 0.03       | 400               | 4                 | 96.2        | 96.3        | <i>96.4</i> | 96          | 96          | 94.6        |
| 0.08       | 4                 | 100               | <i>98.5</i> | <i>98.3</i> | <i>97.1</i> | <i>96.6</i> | 95.8        | 96.1        |
| 0.08       | 8                 | 10                | <i>97.4</i> | <i>97.2</i> | <i>97.2</i> | <i>96.6</i> | 96.2        | 95.7        |
| 0.08       | 8                 | 20                | <i>96.6</i> | 96.2        | 95          | 94.1        | <b>93.4</b> | <b>93.6</b> |
| 0.08       | 8                 | 40                | <i>96.9</i> | <i>96.7</i> | 95.8        | 95.4        | 94.8        | 95          |
| 0.08       | 40                | 10                | <i>97.2</i> | <i>97.1</i> | <i>97</i>   | <i>96.8</i> | <i>96.4</i> | 94.5        |
| 0.08       | 40                | 20                | 95.8        | 95.6        | 95.7        | 94.9        | 94.4        | <b>93</b>   |
| 0.08       | 40                | 40                | <i>96.4</i> | 96.2        | 95.9        | 95.5        | 95.5        | <b>93.6</b> |
| 0.08       | 400               | 4                 | <i>96.4</i> | <i>96.5</i> | <i>96.5</i> | 96.2        | 96.3        | 93.9        |

**Bolded** values indicate coverage rates below 95%.

*Italicized* values indicate coverage rates above 95%.

Missing data were generated completely at random with a response rate of 85%, and data were imputed using an imputation model that correctly specified the covariate effects.

**Table 2** Empirical coverage of 95% confidence intervals for the treatment group mean after parametric multiple imputation.

| ICC    | Cluster size | No. clusters | NORM        | NORM        | NORM        |
|--------|--------------|--------------|-------------|-------------|-------------|
| $\rho$ | m            | k            | FE          | RE          | IGN         |
| 0.03   | 4            | 100          | <i>98.6</i> | <i>97</i>   | 96.3        |
| 0.03   | 8            | 10           | <i>98.5</i> | <i>97.2</i> | <i>97.6</i> |
| 0.03   | 8            | 20           | <i>97.7</i> | 95.1        | 94.5        |
| 0.03   | 8            | 40           | <i>97.8</i> | 95.9        | 95.3        |
| 0.03   | 40           | 10           | <i>97.8</i> | <i>97.1</i> | 95.6        |
| 0.03   | 40           | 20           | 96          | 94.9        | 93.9        |
| 0.03   | 40           | 40           | <i>97.3</i> | 96          | 94.3        |
| 0.03   | 400          | 4            | 96.3        | 96.1        | 94.5        |
| 0.08   | 4            | 100          | <i>98.5</i> | <i>96.9</i> | 95.8        |
| 0.08   | 8            | 10           | <i>98.1</i> | <i>96.8</i> | 96          |
| 0.08   | 8            | 20           | <i>97.1</i> | 94.5        | 93.9        |
| 0.08   | 8            | 40           | <i>97.1</i> | 95.5        | 94.7        |
| 0.08   | 40           | 10           | <i>97.1</i> | <i>97</i>   | 94.5        |
| 0.08   | 40           | 20           | 95.8        | 94.9        | <b>93</b>   |
| 0.08   | 40           | 40           | 96.3        | 95.7        | <b>93.4</b> |
| 0.08   | 400          | 4            | <i>96.5</i> | <i>96.4</i> | 94          |

**Bolded** values indicate coverage rates below 95%.

*Italicized* values indicate coverage rates above 95%.

Missing data were generated completely at random with a response rate of 85%, and data were imputed using an imputation model that correctly specified the covariate effects.

*Model 1b: Estimation of regression coefficient with correctly specified mean model***Table 3** Empirical coverage of 95% confidence intervals for  $\beta_2$  after multiple imputation by PMM.

| ICC  | Cluster size | No. clusters | PMM         | PMM         | PMM         | PMM         | PMM         | PMM         |
|------|--------------|--------------|-------------|-------------|-------------|-------------|-------------|-------------|
| rho  | m            | k            | FE          | dist        | RE          | draw        | avg         | IGN         |
| 0.03 | 4            | 100          | 95.6        | 95.3        | <i>96.8</i> | 96.1        | 95.6        | 96.1        |
| 0.03 | 8            | 10           | <i>97.5</i> | <i>97</i>   | <i>96.5</i> | <i>97.3</i> | <i>96.5</i> | <i>97.2</i> |
| 0.03 | 8            | 20           | 95.1        | 94.1        | 94.5        | 94.9        | 93.8        | 94.6        |
| 0.03 | 8            | 40           | 94.7        | 94.5        | 94.8        | 95.1        | 94.5        | 95          |
| 0.03 | 40           | 10           | <i>97.7</i> | <i>97.5</i> | <i>97.6</i> | <i>97.9</i> | <i>96.8</i> | <i>97.8</i> |
| 0.03 | 40           | 20           | 96.2        | 96.1        | 96.3        | <i>96.5</i> | 94.1        | 96          |
| 0.03 | 40           | 40           | 95.6        | 95.2        | 95.4        | 95.6        | 93.9        | 96.3        |
| 0.03 | 400          | 4            | <i>99.6</i> | <i>99.6</i> | <i>99.6</i> | <i>99.6</i> | <i>99.3</i> | <i>99.6</i> |
| 0.08 | 4            | 100          | 96          | 95.5        | <i>96.4</i> | <i>96.4</i> | 95.3        | 95.9        |
| 0.08 | 8            | 10           | <i>97.2</i> | <i>96.7</i> | <i>97.1</i> | <i>97.6</i> | 95.9        | <i>97</i>   |
| 0.08 | 8            | 20           | 94.9        | 94.2        | 94.5        | 95          | <b>93.3</b> | 94.5        |
| 0.08 | 8            | 40           | 94.5        | 94.5        | 94.7        | 95          | 93.9        | 95.3        |
| 0.08 | 40           | 10           | <i>97.7</i> | <i>97.7</i> | <i>97.7</i> | <i>97.9</i> | <i>97.2</i> | <i>97.7</i> |
| 0.08 | 40           | 20           | 96.3        | 96.1        | 96.1        | 96.1        | 94.5        | 96.1        |
| 0.08 | 40           | 40           | 95.3        | 95.3        | 95.5        | 95.6        | 93.8        | 95.7        |
| 0.08 | 400          | 4            | <i>99.7</i> | <i>99.8</i> | <i>99.8</i> | <i>99.8</i> | <i>99.7</i> | <i>99.7</i> |

**Bolded** values indicate coverage rates below 95%.

*Italicized* values indicate coverage rates above 95%.

Missing data were generated completely at random (MCAR) with a response rate of 85%, and data were imputed using an imputation model that correctly specified the covariate effects.

**Table 4** Empirical coverage of 95% confidence intervals for  $\beta_2$  after parametric multiple imputation.

| ICC<br>$\rho$ | Cluster size<br>m | No. clusters<br>k | NORM<br>FE  | NORM<br>RE  | NORM<br>IGN |
|---------------|-------------------|-------------------|-------------|-------------|-------------|
| 0.03          | 4                 | 100               | <i>97.3</i> | <i>96.6</i> | 95.9        |
| 0.03          | 8                 | 10                | <i>97.6</i> | <i>97.6</i> | <i>97.3</i> |
| 0.03          | 8                 | 20                | 95.3        | 95.2        | 95.3        |
| 0.03          | 8                 | 40                | 95.7        | 95.6        | 95.6        |
| 0.03          | 40                | 10                | <i>98</i>   | <i>98</i>   | <i>97.9</i> |
| 0.03          | 40                | 20                | <i>96.4</i> | <i>96.5</i> | 96.3        |
| 0.03          | 40                | 40                | 95.8        | 95.5        | 96.1        |
| 0.03          | 400               | 4                 | <i>99.8</i> | <i>99.9</i> | <i>99.8</i> |
| 0.08          | 4                 | 100               | <i>97.1</i> | <i>96.6</i> | 96.1        |
| 0.08          | 8                 | 10                | <i>97.5</i> | <i>97.5</i> | <i>97.4</i> |
| 0.08          | 8                 | 20                | 95.3        | 95.2        | 95.4        |
| 0.08          | 8                 | 40                | 95.7        | 95.8        | 95.6        |
| 0.08          | 40                | 10                | <i>98</i>   | <i>97.9</i> | <i>98</i>   |
| 0.08          | 40                | 20                | <i>96.3</i> | <i>96.5</i> | <i>96.6</i> |
| 0.08          | 40                | 40                | 95.7        | 95.3        | 96.3        |
| 0.08          | 400               | 4                 | <i>99.8</i> | <i>99.9</i> | <i>99.8</i> |

**Bolded** values indicate coverage rates below 95%.

*Italicized* values indicate coverage rates above 95%.

Missing data were generated completely at random (MCAR) with a response rate of 85%, and data were imputed using an imputation model that correctly specified the covariate effects.
